# Supplementary material for: Combining galacto-oligosaccharides and 2′-fucosyllactose alters their fermentation kinetics by infant fecal microbiota and influences AhR-receptor dependent cytokine responses in immature dendritic cells
Source: Royal Society of Chemistry journal article supplement (doi:10.1039/d2fo00550f), 2022-01-01
Supplement: d2fo00550f1.pdf [file d2fo00550f1.pdf]

Electronic Supplementary Information (ESI)

**Combining galacto-oligosaccharides and 2'-fucosyllactose alters their fermentation kinetics by infant fecal microbiota and influences AhR-receptor dependent cytokine responses in immature dendritic cells**

Renate Akkerman <sup>a,\*</sup>, Madelon J. Logtenberg <sup>b,\*</sup>, Martin Beukema <sup>a</sup>, Bart J. de Haan <sup>a</sup>, Marijke M. Faas <sup>a</sup>, Erwin G. Zoetendal <sup>c</sup>, Henk A. Schols <sup>b</sup> and Paul de Vos <sup>a</sup>

<sup>a</sup> *Immunoendocrinology, Division of Medical Biology, Department of Pathology and Medical Biology, University of Groningen and University Medical Centre Groningen, Groningen, The Netherlands.*

<sup>b</sup> *Laboratory of Food Chemistry, Wageningen University & Research, Wageningen, The Netherlands.*

<sup>c</sup> *Laboratory of Microbiology, Wageningen University & Research, Wageningen, The Netherlands.*

*\*Authors contributed equally*

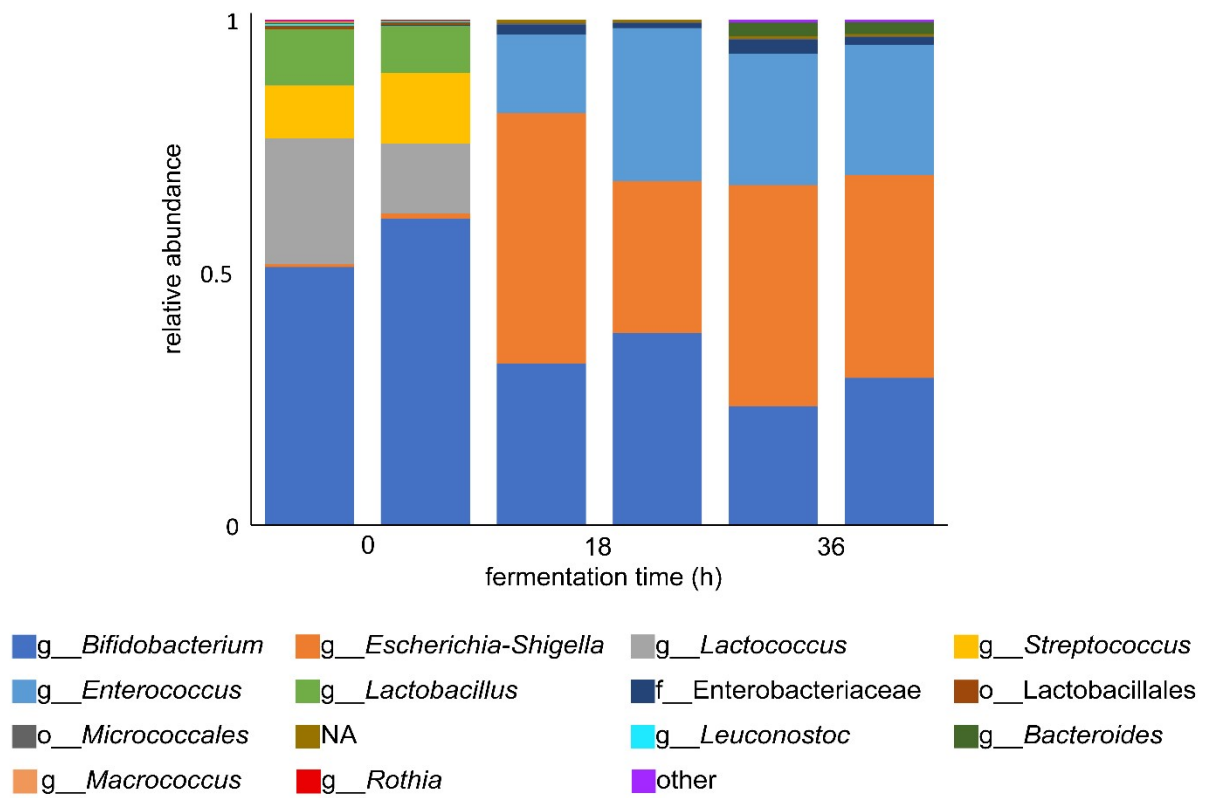

**Figure S1.** Relative abundance of bacteria at the highest classified taxonomy in fermentation digesta collected at the start and after 18 and 36 h from *in vitro* fermentation containing solely fecal inoculum of 8-week-old infants and SIEM medium.

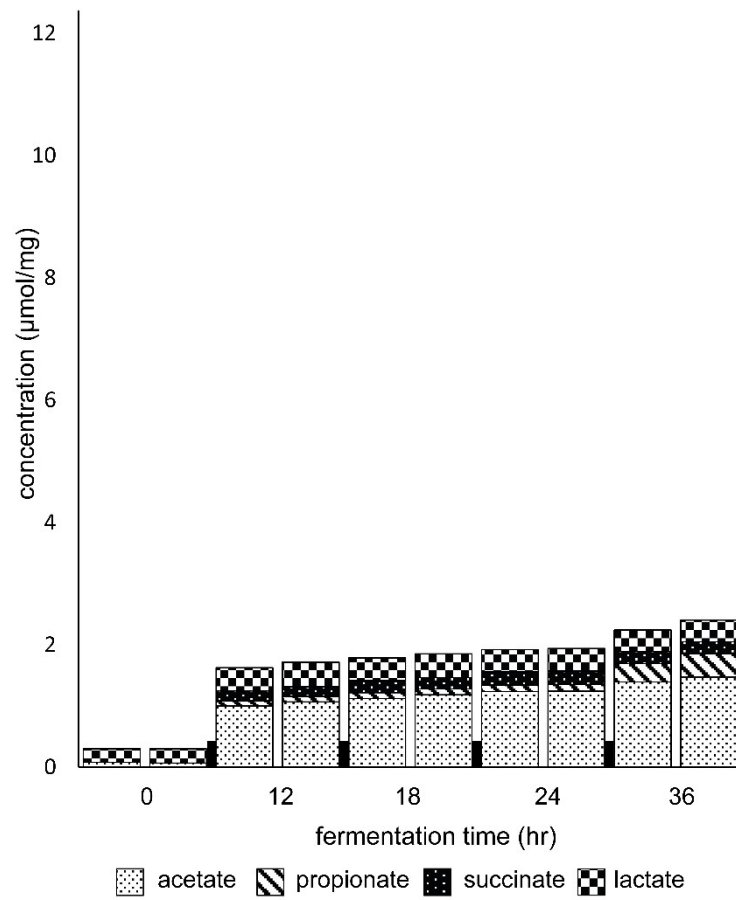

**Figure S2.** Concentration of SCFAs, succinate and lactate in fermentation digesta collected at the start and after 12, 18, 24 and 36 h from *in vitro* fermentation containing solely infant fecal inoculum of 8- week-old infants and SIEM medium.

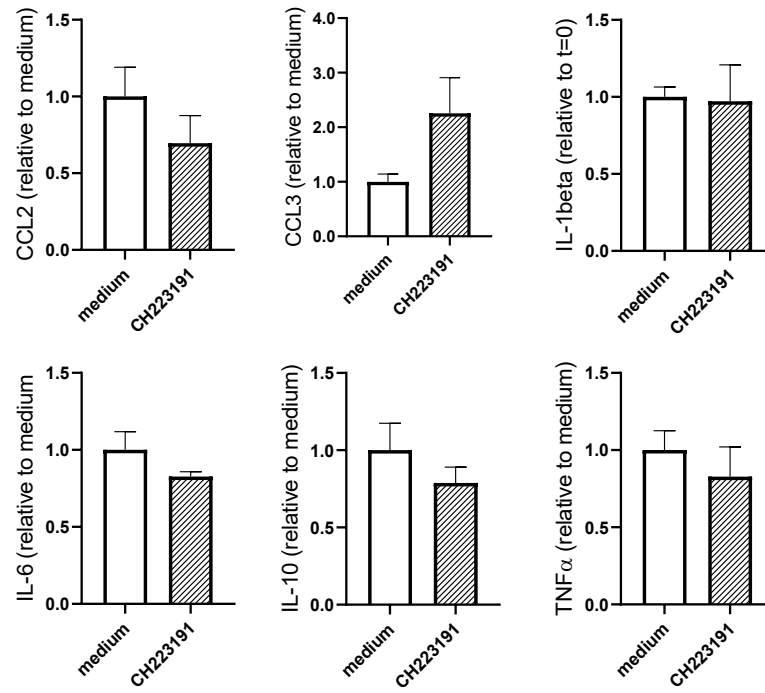

**Figure S3.** Cytokine secretion by DCs after incubation with CH223191. Statistical differences were tested using a paired T-test. Data is expressed as mean with SEM. No significant differences were found between DCs incubated with normal cell culture medium and medium containing CH223191. N=5
